# Supplementary material
Source: PubMed Central journal article supplement (PMC3659941)
Supplement: supp_2012.069476_2012_069476-Contributions.pdf [file supp_2012.069476_2012_069476-Contributions.pdf]

**Manuscript no. HAEMATOL/2012/069476 entitled “Pre-morbid human T-lymphotropic virus type I proviral load, rather than percentage of abnormal lymphocytes, is associated with an increased risk of aggressive adult T-cell leukemia/lymphoma”**

**Authors: Andrew D. Hodson, Daniel J. Laydon, Barbara J. Bain, Paul A. Fields, and Graham P. Taylor**

**Information about the contributions of each person named as having participated in the study**

**1) Guarantor(s), i.e., person(s) who is (are) responsible for the integrity of the work as a whole:** • Graham Taylor, Imperial College London, g.p.taylor@imperial.ac.uk

According to the International Committee of Medical Journal Editors (ICMJE) ([http://www.icmje.org/ethical\\_1author.html](http://www.icmje.org/ethical_1author.html)): “Authorship credit should be based on: 1) substantial contributions to conception and design, acquisition of data, or analysis and interpretation of data; 2) drafting the article or revising it critically for important intellectual content; and 3) final approval of the version to be published. Authors should meet conditions 1, 2, and 3 ..... Acquisition of funding, collection of data, or general supervision of the research group alone does not constitute authorship”.

**The guarantors of this manuscript confirm that all persons designated as authors qualify for authorship, and that each author has participated sufficiently in the work to take public responsibility for appropriate portions of the content.**

**2) Authors who participated in the conception of the study:** Andrew Hodson, Barbara Bain, Paul A Fields, Graham P Taylor

**3) Design & Methods. The following authors were responsible for specific investigations (please detail):**

- Barbara Bain and Andrew Hodson were responsible for assessing lymphocyte morphology
- Graham P Taylor was responsible for HTLV-1 proviral load monitoring

**4) Results. The following authors were responsible for specific portions of the results, including figures and tables (please indicate the person responsible for each figure and each table):**

- Andrew Hodson was responsible for data collection, analysis and produced table 1
- Daniel Laydon was responsible for data analysis
- Andrew Hodson and Barbara Bain obtained the lymphocyte photographs in figure 1

**5) Writing the manuscript. The following authors were responsible for writing the manuscript:**

- Andrew Hodson and Graham P Taylor were responsible for writing the manuscript
- Daniel Laydon, Paul Fields and Barbara Bain were responsible for reviewing and editing the manuscript

**6) Contributors Listed in Acknowledgments: (Examples of those who might be acknowledged include a person who provided purely technical help, writing assistance, or a department chair who provided only general support. Corresponding authors must declare whether they had assistance with the study design, data collection, data analysis, or manuscript preparation. If such assistance was available, the authors must disclose the identity of the individuals who provided this assistance and the entity that supported it. Financial and material support should also be acknowledged.)**

No additional help with study design, data collection, data analysis or manuscript preparation was received.

Mr Daniel Laydon is supported by the Wellcome Trust

Dr Graham Taylor received support from the Imperial NIHR Biomedical Research Centre

Dr Paul Fields received support from the Kings NIHR Biomedical Research Centre
